# Supplementary material
Source: PubMed Central journal article supplement (PMC1779660)
Supplement: tjp0572-0173-SupMat.pdf [file tjp0572-0173-SupMat.pdf]

**Additional Figure. Yusef et al.**

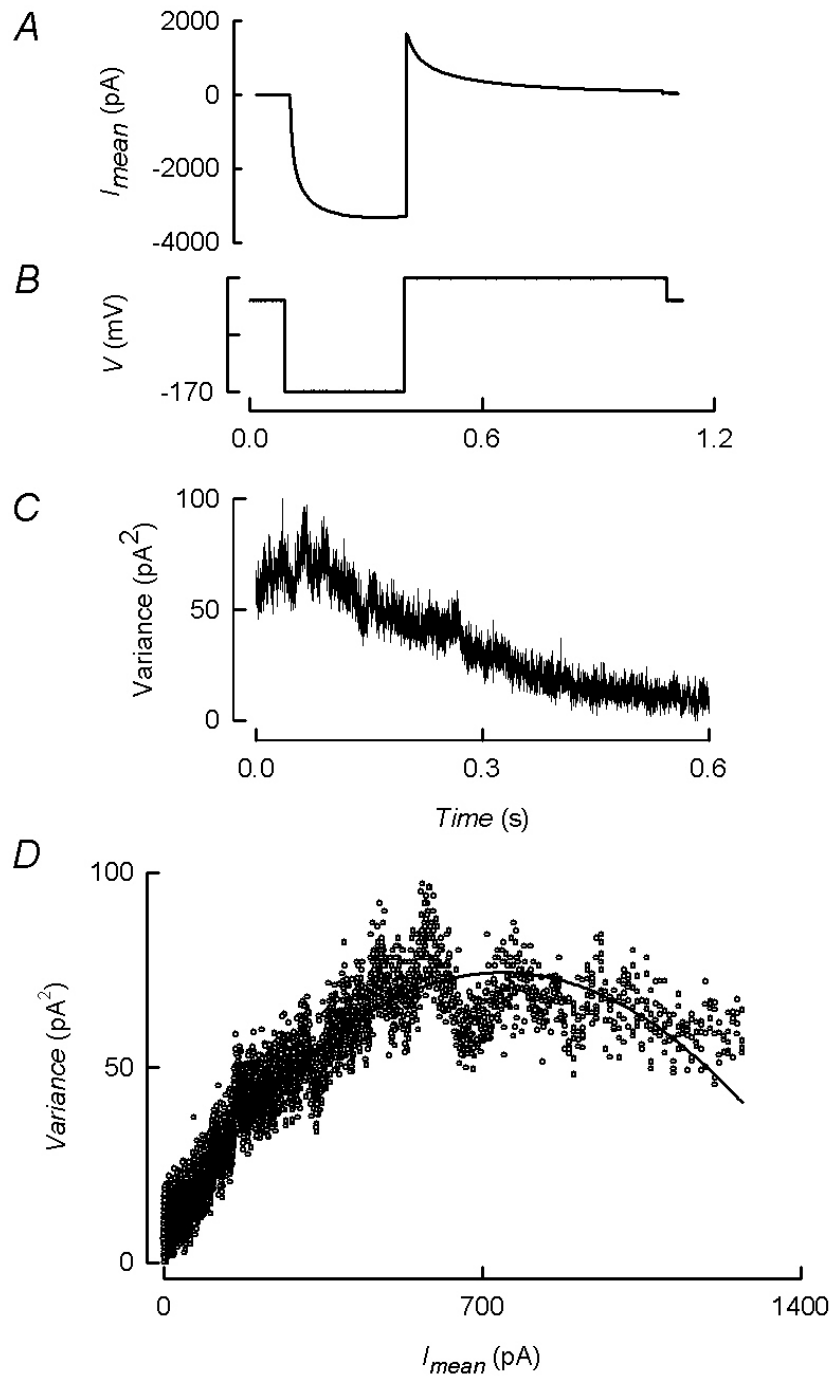

Fig. 1. Variance-mean current relation analysis for ClC-2 channels. A. Mean current obtained from 95 current traces elicited by repeating the pulse shown in B at 20 s intervals. C. Variance for the tail currents obtained during the 30 mV part of the current response. D. Plot of the variance versus the magnitude of the mean current. A parabola of the form  $\sigma^2 = I \langle I \rangle - \langle I^2 \rangle / N$  has been fit to the points;  $i$  is the unitary current,  $\langle I \rangle$  is the macroscopic mean current and  $N$  is the number of channels present. The fitted value of  $i$  was 0.18 pA,  $N=8,341$ . The fit implies that the channel are open at a  $P_o = 0.85$  at the peak of the current.
